# Supplementary material for: Early Medieval Muslim Graves in France: First Archaeological, Anthropological and Palaeogenomic Evidence
Source: PubMed Central journal article supplement (PMC4765927; doi:10.1371/journal.pone.0148583), 2016-02-24
Supplement: pone.0148583.s009.pdf [file pone.0148583.s009.pdf]

**Table S1. PCR and SBE primers used SNPs typing (iPLEX technology, Sequenom)**

| SNP            | Second PCR primer               | First PCR primer                 | Amplicon length (bp) | SBE unextended primer (UEP) | UEP direction |
|----------------|---------------------------------|----------------------------------|----------------------|-----------------------------|---------------|
| <b>Mt SNPs</b> |                                 |                                  |                      |                             |               |
| A_4248         | acgttggatgACCACTCACCTAGCATTAC   | acgttggatgCAGACATATTCCTTAGGTTTG  | 108                  | TACCCATTACAATCTCCAGCAT      | F             |
| B_8280         | acgttggatgGTATTTACCCTATAGCACCC  | acgttggatgCTGTAAAGAGGTGTTGGTTC   | 119                  | ACCCTATAGCACCCCCTCTA        | F             |
| C_13263        | acgttggatgATCGTAGCCTTCTCCACTTC  | acgttggatgAGGAATGCTAGGTGTGGTTG   | 100                  | cGCCTTCTCCACTTCAAGTCA       | F             |
| D_5178         | acgttggatgTTAAACTCCAGCACACGAC   | acgttggatgGGTGGATGGAATTAAGGGTG   | 101                  | TACTACTATCTCGCACCTGAAACAAG  | F             |
| H_2706         | acgttggatgCATAGGGTCTTCTCGTCTTG  | acgttggatgAGGGTTCAGCTGTCTCTTAC   | 109                  | GTCTTCTCGTCTTGCTGTGT        | R             |
| H1_3010        | acgttggatgCGAACCTTTAATAGCGGCTG  | acgttggatgTAGGGTTTACGACCTCGATG   | 84                   | TTAATAGCGGCTGCACCAT         | R             |
| H3_6776        | acgttggatgGCTTCCTAGGGTTTATCGTG  | acgttggatgGGAGGTGAAATATGCTCGTG   | 100                  | TTATCGTGTGAGCACACCA         | F             |
| HV_14766       | acgttggatgACAAGAACACCAATGACCCC  | acgttggatgGGGAGGTTCGATGAATGAGTG  | 97                   | ACCCAATACGCAAAA             | F             |
| I_10034        | acgttggatgAATAGTACCGTTAACTTCC   | acgttggatgGTAAGGCTAGGAGGGTGTG    | 120                  | TACCGTTAACTTCCAATTAAGTAG    | F             |
| J_12612        | acgttggatgGCTCTCCCTAAGCTTCAAAC  | acgttggatgCTATGATGGACCATGTAACG   | 100                  | cTCTCCATAATATTCATCCCTGT     | F             |
| K_10550        | acgttggatgGGAATACTAGTATATCGCTC  | acgttggatgTTGAGGGTTATGAGAGTAGC   | 118                  | gggcTCGCTCACACCTCAT         | F             |
| L2_2885        | acgttggatgAGACTTACCAGTCAAAGCG   | acgttggatgTCCCTAGGGTAACTTGTTC    | 97                   | CTTACCAGTCAAAGCGAACTAC      | F             |
| L3_3594        | acgttggatgTTCTACTATGAACCCCCCTC  | acgttggatgAGTAAACGGCTAGGCTAGAG   | 116                  | CCCCCTCCCATAACCAACCCCCTGGT  | F             |
| M_10400        | acgttggatgTCTGGCCTATGAGTGACTAC  | acgttggatgGAGTCGAAATCATTTCGTTTTG | 101                  | ACAAAAAGGATTAGACTGAAC       | F             |
| N_10873        | acgttggatgGGGAACAGCTAAATAGGTTG  | acgttggatgATCAACACAACCACCCACAG   | 108                  | TGTTGATTTGGTTAAAAAATAGTAG   | R             |
| N1_10238       | acgttggatgGGTAAAAGGAGGGCAATTC   | acgttggatgCGCGTCCCTTTCTCCATAAA   | 100                  | TTCTAGATCAAATAATAAGAAGGT    | R             |
| N1a_13780      | acgttggatgACAACATTTCCCCCGCATC   | acgttggatgAGTCCTAGGAAAGTGACAGC   | 106                  | CCCCTTCCAAACAACA            | F             |
| R_12705        | acgttggatgCAGACCCAAACATTAATCAG  | acgttggatgGGTTGTTAGCGGTAACCTAAG  | 101                  | AACTAAGATTAGTATGGTAATTAGGAA | R             |
| R0_11719       | acgttggatgGAGTGCCTTCGTAGTTTGGAG | acgttggatgCGCAGTCATTCTCATAATCG   | 100                  | GGCAGAATAGTAATGAGGATGTAAG   | R             |
| R9_13928       | acgttggatgGGTTTTGGCTCGTAAGAAGG  | acgttggatgTCTCCAACATACTCGGATTC   | 98                   | GTGCGGTGTGTGATG             | R             |
| T_1888         | acgttggatgTAGGTAGCTCGTCTGGTTTC  | acgttggatgCTAACCCCTATACCTTCTGC   | 113                  | GGGGGTCTTAGCTTTGG           | R             |
| U_11467        | acgttggatgGGTTGAGAATGAGTGTGAGG  | acgttggatgCGCTGGGTCAATAGTACTTG   | 100                  | ACCATAGCCGCCTAGTTT          | R             |
| U4_11332       | acgttggatgCTCACTGCCCAAGAACTATC  | acgttggatgGGAGTCCGTAAAGAGGTATC   | 117                  | CAAGAACTATCAAACCTCTGAGC     | F             |
| U5_13617       | acgttggatgTTACTCTCATCGCTACCTCC  | acgttggatgAAGCGAGGTTGACCTGTTAG   | 99                   | GCGCCTATAGCACTCGAATAAT      | F             |
| V_4580         | acgttggatgACCTGAGTAGGCCTAGAAAT  | acgttggatgACTTGATGGCAGCTTCTGTG   | 111                  | tAGTAGGCCTAGAAATAAACAT      | F             |
| W_3505         | acgttggatgACCAAAGAGCCCCTAAAACC  | acgttggatgTAGAAGAGCGATGGTGAGAG   | 104                  | TAAAACCCGCCACATCT           | F             |
| X_6371         | acgttggatgCCGTAGACCTAACCATCTTC  | acgttggatgGTGATGAAATTGATGGCCCC   | 93                   | ACCTAGCAGGTGTCTC            | F             |

**Table S2.** Continued

| SNP           | Second PCR primer              | First PCR primer                 | Amplicon length (bp) | SBE unextended primer (UEP) | UEP direction |
|---------------|--------------------------------|----------------------------------|----------------------|-----------------------------|---------------|
| <b>Y-SNPs</b> |                                |                                  |                      |                             |               |
| E_L537        | acgttggatgTGCTGTCTTTTTGAGAGGAG | acgttggatgACGTGAGCCATTGTAGACAG   | 110                  | TTTTGAGAGGAGATTAGGA         | F             |
| E1b1b_M215    | acgttggatgATCCAGCACAGAAGCATCAG | acgttggatgCATACTTGCTGCATTAAGAC   | 84                   | GCTGGAACAGTTAGAAAG          | R             |
| F_M213        | acgttggatgTATTCAGAACTTAAAACATC | acgttggatgCAAAACAACCTTTATAACAG   | 109                  | TATTCAGAACTTAAAACATCTCGTTAC | R             |
| G_M201        | acgttggatgCTCAGATCTAATAATCCAG  | acgttggatgTCCAGCATCCTATCAGCTTC   | 100                  | GATCTAATAATCCAGTATCAACTGAGG | F             |
| I_M170        | acgttggatgGTGAGACACAACCCACACTG | acgttggatgCATATTCTGTGCATTATAC    | 102                  | GAGACACAACCCCACTGAAAAAAA    | R             |
| J_M304        | acgttggatgCTTTCAAAACGTCTTATACC | acgttggatgTGTAACAAACAGTATGTGGG   | 116                  | TTATACCAAAAATATCACCAGTTGT   | R             |
| K_M9          | acgttggatgCTGCAAAGAAACGGCCTAAG | acgttggatgCATTGAACGTTTGAACATGTC  | 94                   | GGCCTAAGATGGTTGAAT          | F             |
| R_M207        | acgttggatgGGGCAAATGTAAGTCAAGC  | acgttggatgTCACTTCAACCTCTTGTTGG   | 102                  | gATGTAAGTCAAGCAAGAAATTTA    | F             |
| R1a_M511      | acgttggatgACCATCAACATTGCCATTGC | acgttggatgCAGAGAAAAGACATTTTCAGGG | 103                  | gaagCAACATTGCCATTGCTTTAGT   | F             |
| R1b_M343      | acgttggatgTCTTGCTCTTTCCCAACAC  | acgttggatgTATGCAAATGCAGAGTGCCC   | 111                  | CCCCACATATCTCCAGGTGT        | R             |
