# Supplementary material for: Early Medieval Muslim Graves in France: First Archaeological, Anthropological and Palaeogenomic Evidence
Source: PubMed Central journal article supplement (PMC4765927; doi:10.1371/journal.pone.0148583), 2016-02-24
Supplement: pone.0148583.s010.pdf [file pone.0148583.s010.pdf]

**Table S2. Radiocarbon dating**

| Burial | Sample | Code        | Date calibrated (95.4% probability) |
|--------|--------|-------------|-------------------------------------|
| SP7080 | A      | Beta-378995 | 684-876 cal AD                      |
| SP7080 | B      | Erl-15766   | 579-761 cal AD                      |
| SP7089 | A      | Beta-378996 | 637-765 cal AD                      |
| SP9269 | A      | Beta-378997 | 649-767 cal AD                      |
| SP9269 | B      | Erl-15768   | 651-802 AD                          |
