# Supplementary material for: Early Medieval Muslim Graves in France: First Archaeological, Anthropological and Palaeogenomic Evidence
Source: PubMed Central journal article supplement (PMC4765927; doi:10.1371/journal.pone.0148583), 2016-02-24
Supplement: pone.0148583.s011.pdf [file pone.0148583.s011.pdf]

**Table S3. Mutated Y-SNPs detected for the three human remains analysed.**

|               | Y-position<br>(GRCh37) | Diagnostic<br>Mutation | Allele |        |        | Support |        |        | Nb. reads |        |        | Nb. unique reads |        |        |
|---------------|------------------------|------------------------|--------|--------|--------|---------|--------|--------|-----------|--------|--------|------------------|--------|--------|
|               |                        |                        | SP7080 | SP7089 | SP9262 | SP7080  | SP7089 | SP9262 | SP7080    | SP7089 | SP9262 | SP7080           | SP7089 | SP9262 |
| DE/M145       | 21717208               | C→T                    | T      | -      | T      | 100     | -      | 100    | 1         | -      | 17     | 1                | -      | 1      |
| E/L537        | 6861075                | G→A                    | A      | -      | A      | 100     | -      | 100    | 1         | -      | 447    | 1                | -      | 6      |
| E1b1/P179     | 14060308               | A→C                    | -      | -      | C      | -       | -      | 100    | -         | -      | 6      | -                | -      | 2      |
| E1b1/P180     | 18601274               | G→A                    | -      | -      | A      | -       | -      | 100    | -         | -      | 224    | -                | -      | 3      |
| E1b1b1/L336   | 21903853               | G→A                    | -      | -      | A      | -       | -      | 100    | -         | -      | 16     | -                | -      | 1      |
| E1b1b1/M243   | 15019092               | T→C                    | C      | C      | C      | 100     | 100    | 100    | 1         | 1      | 166    | 1                | 1      | 2      |
| E1b1b1b/Z827  | 7290454                | G→C                    | -      | -      | C      | -       | -      | 100    | -         | -      | 756    | -                | -      | 2      |
| E1b1b1b1/L335 | 2710013                | A→G                    | -      | G      | G      | -       | 100    | 100    | -         | 129    | 1      | -                | 1      | 1      |
| E1b1b1b1a/M81 | 21892572               | C→T                    | T      | T      | -      | 100     | 100    |        | 250       | 1      | -      | 2                | 1      | -      |
