# Supplementary material for: Early Medieval Muslim Graves in France: First Archaeological, Anthropological and Palaeogenomic Evidence
Source: PubMed Central journal article supplement (PMC4765927; doi:10.1371/journal.pone.0148583), 2016-02-24
Supplement: pone.0148583.s012.pdf [file pone.0148583.s012.pdf]

**Table S4. Consensus HVR-1 sequences and SNP retrieved for the three human samples**

|        | <b>nps</b>    | <b>HVR1</b>                        | <b>mt-SNP</b>   | <b>mt-Hg</b> | <b>Y-SNP</b>  | <b>Y-Hg</b> |
|--------|---------------|------------------------------------|-----------------|--------------|---------------|-------------|
| SP7080 | 16008 - 16310 | 16129A 16215G 16223T 16278T 16294T | 2758C           | L1c          | M215G         | E1b1b       |
| SP7089 | 16008 - 16310 | 16224C 16256T                      | 11467G - 10550G | K            | -             | -           |
| SP9262 | 16009 - 16400 | CRS                                | 2706A - 3010A   | H1           | L537A - M215G | E1b1b       |
