# Supplementary material for: Early Medieval Muslim Graves in France: First Archaeological, Anthropological and Palaeogenomic Evidence
Source: PubMed Central journal article supplement (PMC4765927; doi:10.1371/journal.pone.0148583), 2016-02-24
Supplement: pone.0148583.s013.pdf [file pone.0148583.s013.pdf]

**Table S5. HVR-1 sequences, mitochondrial and Y chromosome SNPs of the researchers involved in this study.**

|               | HVR-1                          | Mt-SNPs | Mt Hg | Y-SNPs | Y Hg |
|---------------|--------------------------------|---------|-------|--------|------|
| Manipulator 1 | 16209C                         | 7028C   | H     | -      | -    |
| Manipulator 2 | 16189C, 16234T                 | 7028C   | H     | -      | -    |
| Manipulator 3 | 16093C, 16189C, 16270T, 16274A | -       | U5    | -      | -    |
| Manipulator 4 | CRS                            | 2706A   | H     | M343   | R1b  |
